# Supplementary material
Source: HighWire-hosted journal article supplement (http://www.jrheum.org/highwire/filestream/29661/field_highwire_adjunct_files/0/131290DataSuppl.pdf)
Supplement: 131290DataSuppl.pdf [file 131290DataSuppl.pdf]

Supplementary Table 1. Clinical, sociodemographic, and biochemical determinants of erythrocyte MTX-PG levels at 3 months of treatment (univariate analysis).

| Variable                                         | Derivation cohort |            |         |         |           |              | Validation cohort |            |         |         |           |              |
|--------------------------------------------------|-------------------|------------|---------|---------|-----------|--------------|-------------------|------------|---------|---------|-----------|--------------|
|                                                  | N                 | St $\beta$ |         |         |           |              | N                 | St $\beta$ |         |         |           |              |
|                                                  |                   | MTX-PG1    | MTX-PG2 | MTX-PG3 | MTX-PG4+5 | Total MTX-PG |                   | MTX-PG1    | MTX-PG2 | MTX-PG3 | MTX-PG4+5 | Total MTX-PG |
| Age, years, mean (SD)                            | 93                | 0,22*      | 0,20#   | 0,22*   | 0,16      | 0,25*        | 247               | 0,13*      | 0,22*** | 0,24*** | 0,27***   | 0,30***      |
| Female (%)                                       | 93                | 0,00       | -0,13   | -0,13   | 0,00      | -0,11        | 247               | -0,01      | -0,11#  | -0,16*  | -0,16*    | -0,1**8      |
| BSA, m3, mean (SD)                               | 0                 | n/a        | n/a     | n/a     | n/a       | n/a          | 245               | 0,057      | -0,05   | -0,07   | -0,05     | -0,07        |
| DAS28esr, mean (SD)                              | 80                | 0,12       | 0,03    | 0,22#   | 0,24*     | 0,22#        | 247               | 0,10       | 0,10    | 0,13*   | 0,11#     | 0,14**       |
| Rheumatoid factor positive (%)                   | 83                | -0,01      | 0,01    | 0,10    | 0,09      | 0,09         | 223               | -0,03      | 0,13#   | 0,06    | -0,02     | 0,05         |
| Anti-CCP positive (%)                            | 83                | 0,10       | -0,02   | 0,03    | 0,01      | 0,01         | 223               | -0,08      | 0,05    | 0,05    | 0,08      | 0,08         |
| Days of treatment at study visit, mean (SD)      | 87                | -0,08      | 0,11    | 0,16    | 0,05      | 0,14         | 234               | 0,05       | 0,06    | 0,16*   | 0,03      | 0,10         |
| Intramuscular administration of methotrexate (%) | 85                | 0,11       | -0,16   | 0,02    | -0,02     | -0,05        | 0                 | n/a        | n/a     | n/a     | n/a       | n/a          |
| Other DMARD use (%)                              | 85                | 0,16       | 0,04    | 0,14    | 0,17      | 0,16         | 221               | -0,12#     | 0,00    | -0,02   | -0,03     | -0,03        |
| Hydroxychloroquine use (%)                       | 85                | 0,17       | -0,04   | 0,07    | 0,17      | 0,09         | 221               | -0,12#     | 0,00    | -0,02   | -0,03     | -0,03        |
| Sulfasalazine use (%)                            | 85                | 0,03       | 0,07    | 0,18#   | 0,12      | 0,17         | 221               | -0,12#     | 0,00    | -0,02   | -0,03     | -0,03        |
| Biological use (%)                               | 85                | 0,00       | 0,00    | -0,08   | -0,08     | -0,07        | 0                 | n/a        | n/a     | n/a     | n/a       | n/a          |
| Corticosteroid use                               | 85                | -0,03      | -0,03   | 0,03    | 0,02      | 0,01         | 221               | 0,09       | 0,05    | -0,06   | -0,01     | -0,02        |
| Corticosteroid IM vs no Corticosteroid           | 85                | -0,02      | -0,03   | 0,03    | 0,11      | 0,05         | 221               | 0,13       | 0,10    | -0,16   | -0,10     | -0,10        |
| Corticosteroid Oral vs no Corticosteroid         | 85                | -0,02      | -0,02   | 0,02    | -0,03     | -0,01        | 221               | 0,18#      | 0,06    | -0,07   | 0,00      | -0,02        |
| C-reactive protein, mg/L, median (IQR)           | 91                | 0,22*      | 0,22*   | 0,14    | 0,01      | 0,15         | 246               | 0,09       | 0,09    | 0,08    | 0,10      | 0,11#        |
| Erythrocyte sedimentation rate, >44 vs <44 mm/hr | 92                | 0,05       | 0,13    | 0,18#   | 0,15      | 0,20#        | 247               | 0,06       | 0,06    | 0,08    | 0,12#     | 0,11#        |
| Albumin, (g/L), mean (SD)                        | 88                | -0,09      | -0,11   | -0,23   | -0,11     | -0,20#       | 224               | -0,01      | -0,02   | 0,01    | -0,01     | -0,01        |
| Creatinine, >78 vs <78 mmol/l                    | 93                | 0,03       | 0,09    | 0,12    | 0,06      | 0,12         | 98                | 0,11       | 0,18#   | 0,21    | 0,23*     | 0,25         |
| Erythrocyte folate, nmol/L, median (IQR)         | 88                | 0,08       | 0,10    | 0,30**  | 0,21#     | 0,27*        | 218               | 0,07       | 0,08    | 0,18**  | 0,16*     | 0,18**       |
| Serum folate, nmol/L median (IQR)                | 89                | 0,35***    | -0,04   | 0,15    | 0,07      | 0,09         | 224               | -0,03      | -0,01   | -0,02   | -0,02     | -0,02        |
| eGFR-MDRD >88 vs <88 ml/min/BSA                  | 93                | 0,02       | -0,02   | -0,02   | -0,15     | -0,09        | 98                | -0,11      | -0,03   | -0,12   | -0,22*    | -0,17#       |
| Vitamin B12, pmol/L, median (IQR)                | 88                | 0,14       | -0,02   | 0,04    | 0,03      | 0,03         | 224               | -0,01      | 0,14*   | 0,11    | -0,01     | 0,08         |
| Vitamin B6, nmol/L, median (IQR)                 | 89                | -0,10      | -0,10   | 0,08    | 0,06      | 0,03         | 199               | 0,01       | 0,01    | -0,01   | -0,04     | -0,03        |
| Homocysteine umol/l, median (IQR)                | 87                | 0,16       | 0,09    | 0,14    | 0,10      | 0,14         | 225               | 0,03       | 0,05    | 0,06    | 0,20**    | 0,15*        |
| Alcohol consumption, >4 vs <4 glasses per month  | 38                | 0,27       | 0,07    | -0,21   | -0,29     | -0,21        | 230               | 0,04       | 0,10    | 0,14#   | 0,09      | 0,13#        |
| Alcohol consumption, >32 vs <4 glasses per       | 38                | -0,01      | -0,05   | -0,15   | -0,16     | -0,16        | 230               | 0,04       | 0,02    | 0,18*   | 0,11      | 0,14#        |
| Cola consumption, >8 vs <6 glasses per month     | 82                | -0,02      | 0,13    | 0,23*   | 0,09      | 0,19#        | 227               | -0,02      | -0,17** | -0,08   | 0,04      | -0,06        |
| Coffee consumption, >120 vs <112 cups per month  | 82                | -0,01      | -0,09   | -0,16   | -0,17     | -0,18        | 228               | 0,11#      | 0,02    | 0,11#   | 0,07      | 0,09         |
| Tea consumption, 8-168 cups/month vs rest        | 82                | -0,11      | -0,14   | -0,02   | 0,01      | -0,05        | 225               | 0,02       | -0,09   | -0,05   | -0,03     | -0,06        |

|                                          |    |      |      |      |      |      |     |       |      |       |      |      |
|------------------------------------------|----|------|------|------|------|------|-----|-------|------|-------|------|------|
| Tea consumption, >168 cups/month vs rest | 82 | 0,13 | 0,03 | 0,04 | 0,10 | 0,08 | 225 | -0,03 | 0,05 | -0,03 | 0,03 | 0,01 |
|------------------------------------------|----|------|------|------|------|------|-----|-------|------|-------|------|------|

\* p < 0.05. \*\*p < 0.01. \*\*\*p < 0.001. # = p < 0.1. ln: natural logarithm; DAS28esr: ESR based disease activity score 28; Anti-CCP: anti-cyclic citrullinated peptide antibody; DMARD: disease-modifying antirheumatic agent; ESR: erythrocyte sedimentation rate; GFR: Glomerular Filtration Rate; MTX: methotrexate; PG: polyglutamate.

Supplementary Table 2. SNP within cellular folate transport and metabolism routes in relation to methotrexate polyglutamate levels at 3 months of treatment in derivation and validation cohort. Analysis was done using ANCOVA with correction for age and sex.

|                   |      |         | Derivation                    |                      |                    |                      |                     | Validation                    |     |                     |                    |                    |                    |                     |
|-------------------|------|---------|-------------------------------|----------------------|--------------------|----------------------|---------------------|-------------------------------|-----|---------------------|--------------------|--------------------|--------------------|---------------------|
|                   |      |         | Estimated Marginal Means (SE) |                      |                    |                      |                     | Estimated Marginal Means (SE) |     |                     |                    |                    |                    |                     |
|                   |      |         | N                             | MTX-PG1              | MTX-PG2            | MTX-PG3              | MTX-PG4+5           | MTX-PG total                  | N   | MTX-PG1             | MTX-PG2            | MTX-PG3            | MTX-PG4+5          | MTX-PG total        |
| rs73598374 ADA†   | g>a  | WT      | 68                            | 50.3 (6.1)           | 28.8 (1.7)         | 40.9 (2.4)           | 14.6 (2.3)          | 84.4 (5.1)                    | 210 | 43.1 (3.5)          | 22.6 (0.7)         | 49.7 (1.3)         | 30.1 (1.6)         | 102.4 (2.8)         |
|                   |      | het     | 15                            | 38.9 (12.2)          | 24.2 (3.5)         | 43.2 (4.9)           | 18.3 (4.7)          | 85.7 (10.3)                   | 30  | 42.8 (8.6)          | 22.8 (1.7)         | 51.4 (3.1)         | 29.3 (3.8)         | 103.4 (6.9)         |
| rs1127354 ITPA    | c>a  | WT      | 81                            | 44.8 (5.4)           | 27.1 (1.6)         | 39.1 (2.2)           | <b>13.2 (2.1)*</b>  | 79.3 (4.6)                    | 211 | 43.3 (3.4)          | 23.1 (0.7)         | 50.5 (1.3)         | 30.4 (1.5)         | 103.9 (2.8)         |
|                   |      | Het/Var | 12                            | 62.0 (13.0)          | 27.5 (3.8)         | 49.6 (5.6)           | <b>25.1 (4.9)*</b>  | 102.2 (11.0)                  | 36  | 40.7 (7.8)          | 20.6 (1.5)         | 48.7 (2.8)         | 27.6 (3.4)         | 96.9 (6.3)          |
| rs17602729 AMPD1  | c>t  | WT      | 66                            | 46.7 (6.3)           | 28.2 (1.8)         | 41.6 (2.5)           | 15.6 (2.4)          | 85.4 (5.3)                    | 198 | 41.8 (3.6)          | <b>21.9 (0.7)*</b> | 49.4 (1.3)         | 29.9 (1.6)         | 101.2 (2.9)         |
|                   |      | Het/Var | 17                            | 54.2 (11.2)          | 27.3 (3.2)         | 40.5 (4.5)           | 14.2 (4.3)          | 82.0 (9.4)                    | 42  | 48.4 (7.3)          | <b>25.7 (1.4)*</b> | 52.6 (2.6)         | 30.3 (3.2)         | 108.6 (5.9)         |
| rs10106587 GGH    | a>c  | Wt      | 36                            | 48.8 (8.3)           | 28.2 (2.4)         | 40.7 (3.4)           | 13.0 (3.2)          | 81.9 (7.0)                    | 120 | 44.8 (4.4)          | 22.0 (0.9)         | 49.5 (1.6)         | 30.7 (1.9)         | 102.2 (3.5)8        |
|                   |      | het     | 42                            | 52.1 (7.6)           | 28.4 (2.2)         | 41.4 (3.1)           | 15.7 (2.9)          | 85.5 (6.4)                    | 106 | 43.2 (4.9)          | 23.6 (1.0)         | 51.3 (1.7)         | 29.1 (2.2)         | 104.0 (3.9)         |
|                   |      | var     | 5                             | 27.2 (20.7)          | 25.1 (6.0)         | 43.6 (8.4)           | 22.7 (8.0)          | 91.3 (17.5)                   | 14  | 24.1 (12.7)         | 20.4 (2.5)         | 44.3 (4.5)         | 29.9 (5.6)         | 94.6 (10.2)         |
| rs3758149 GGH     | c>t  | Wt      | 44                            | 45.2 (7.2)           | 27.4 (2.1)         | 42.3 (2.9)           | 17.8 (2.8)          | 87.5 (6.1)                    | 112 | 42.2 (4.7)          | 22.2 (0.9)         | 48.6 (1.7)         | 29.6 (2.1)         | 100.5 (3.8)         |
|                   |      | het     | 32                            | 47.9 (8.5)           | 28.0 (2.5)         | 38.8 (3.4)           | 11.9 (3.3)          | 78.6 (7.2)                    | 113 | 42.3 (4.6)          | 23.2 (0.9)         | 50.5 (1.6)         | 29.5 (2.0)         | 103.1 (3.7)         |
|                   |      | var     | 7                             | 75.7 (17.6)          | 32.8 (5.1)         | 48.0 (7.1)           | 13.5 (6.8)          | 94.3 (14.9)                   | 15  | 52.3 (12.2)         | 21.5 (2.4)         | 54.7 (4.3)         | 34.9 (5.4)         | 111.1 (9.7)         |
| rs3784862 ABCC1   | a>g  | Wt      | 38                            | 46.8 (7.9)           | 25.9 (2.2)         | 42.1 (3.2)           | 17.8 (3.0)          | 85.8 (6.7)                    | 133 | <b>47.0 (4.2)*</b>  | 23.6 (0.8)         | 49.9 (1.5)         | 28.0 (1.9)         | 101.5 (3.4)         |
|                   |      | het     | 34                            | 52.9 (8.0)           | 30.9 (2.3)         | 40.9 (3.3)           | 12.2 (3.1)          | 84.0 (6.8)                    | 90  | <b>32.7 (5.1)*</b>  | 21.1 (1.0)         | 49.9 (1.9)         | 33.4 (2.3)         | 104.4 (4.2)         |
|                   |      | var     | 11                            | 35.0 (15.0)          | 24.6 (4.3)         | 39.6 (6.1)           | 17.4 (5.8)          | 81.6 (12.7)                   | 17  | <b>63.6 (11.3)*</b> | 22.5 (2.3)         | 50.6 (4.1)         | 28.2 (5.0)         | 101.4 (9.2)         |
| rs35592 ABCC1     | t>c  | WT/Het  | 76                            | 48.2 (5.8)           | 27.8 (1.7)         | <b>42.6 (2.3)*</b>   | 16.1 (2.2)          | 86.5 (4.8)                    | 229 | 43.3 (3.3)          | 22.7 (0.7)         | 50.0 (1.2)         | 30.2 (1.5)         | 102.9 (2.7)         |
|                   |      | Var     | 7                             | 49.9 (17.8)          | 30.1 (5.1)         | <b>25.9 (6.9)*</b>   | 4.5 (6.7)           | 60.5 (14.6)                   | 11  | 36.6 (14.5)         | 20.7 (2.9)         | 47.9 (5.2)         | 23.5 (6.4)         | 92.1 (11.6)         |
| rs2274407 ABCC4   | g>t  | WT      | 71                            | 48.1 (5.9)           | 27.8 (1.7)         | 40.5 (2.4)           | 14.3 (2.3)          | 82.7 (4.9)                    | 212 | 42.7 (3.5)          | 22.5 (0.7)         | 49.7 (1.2)         | 29.7 (1.5)         | 101.9 (2.8)         |
|                   |      | Het/Var | 12                            | 49.9 (13.7)          | 29.5 (4.0)         | 46.8 (5.5)           | 21.4 (5.2)          | 97.7 (11.4)                   | 28  | 45.8 (9.1)          | 23.0 (1.8)         | 52.3 (3.2)         | 32.5 (4.0)         | 107.7 (7.3)         |
| rs868853 ABCC4    | g>a  | WT/Het  | 65                            | 48.4 (6.1)           | 27.5 (1.7)         | 41.1 (2.3)           | 15.3 (2.3)          | 83.9 (4.9)                    | 205 | <b>45.6 (3.5)*</b>  | 22.8 (0.7)         | 49.9 (1.3)         | 29.4 (1.5)         | 102.0 (2.8)         |
|                   |      | Var     | 15                            | 51.1 (13.0)          | 32.2 (3.7)         | 46.2 (5.0)           | 16.8 (5.0)          | 95.3 (10.6)                   | 34  | <b>27.5 (8.2)*</b>  | 21.7 (1.6)         | 50.9 (2.9)         | 34.5 (3.6)         | 107.0 (6.6)         |
| rs1801394 MTRR    | a>g  | Wt      | 23                            | 39.5 (9.9)           | 26.9 (2.9)         | 39.7 (4.0)           | 15.4 (3.9)          | 82.0 (8.4)                    | 48  | 43.2 (7.0)          | 24.6 (1.4)         | 54.8 (2.5)         | 33.3 (3.1)         | 112.7 (5.6)         |
|                   |      | het     | 39                            | 51.5 (7.7)           | 29.8 (2.2)         | 42.2 (3.1)           | 14.5 (3.0)          | 86.4 (6.5)                    | 109 | 46.4 (4.7)          | 22.2 (0.9)         | 48.4 (1.7)         | 29.4 (2.1)         | 100.0 (3.7)         |
|                   |      | var     | 21                            | 51.8 (10.4)          | 25.8 (3.0)         | 41.4 (4.2)           | 16.6 (4.0)          | 83.8 (8.8)                    | 83  | 38.6 (5.3)          | 22.0 (1.0)         | 49.3 (1.9)         | 28.9 (2.3)         | 100.3 (4.2)         |
| rs2139560 ABCC5   | t>c  | Wt      | 34                            | <b>34.2 (7.7)**</b>  | <b>24.3 (2.3)*</b> | 38.5 (3.3)           | 16.4 (3.2)          | 79.3 (7.0)                    | 85  | 40.7 (5.2)          | 22.5 (1.0)         | 50.5 (1.8)         | 31.5 (2.3)         | 104.5 (4.1)         |
|                   |      | het     | 38                            | <b>48.7 (7.1)**</b>  | <b>28.7 (2.1)*</b> | 41.5 (3.1)           | 14.2 (3.0)          | 84.4 (6.4)                    | 111 | 45.9 (4.7)          | 22.9 (0.9)         | 49.8 (1.7)         | 29.4 (2.1)         | 102.1 (3.8)         |
|                   |      | var     | 11                            | <b>90.6 (13.0)**</b> | <b>36.6 (3.9)*</b> | 49.2 (5.6)           | 15.5 (5.5)          | 101.4 (11.7)                  | 44  | 40.2 (7.5)          | 22.0 (1.5)         | 48.9 (2.7)         | 27.9 (3.3)         | 98.8 (6.0)          |
| rs2372536 ATIC    | c>g  | Wt      | 37                            | <b>37.0 (7.7)**</b>  | 25.9 (2.4)         | 37.3 (3.2)           | 15.6 (3.2)          | 78.8 (6.8)                    | 108 | 43.5 (4.7)          | 22.8 (0.9)         | 50.1 (1.7)         | 28.7 (2.1)         | 101.7 (3.7)         |
|                   |      | het     | 39                            | <b>50.1 (7.2)**</b>  | 29.5 (2.2)         | 43.1 (3.0)           | 14.3 (2.9)          | 86.9 (6.3)                    | 98  | 42.3 (5.0)          | 23.0 (1.0)         | 51.0 (1.8)         | 32.3 (2.2)         | 106.3 (4.0)         |
|                   |      | var     | 7                             | <b>94.0 (16.5)**</b> | 29.9 (5.0)         | 50.6 (50.6)          | 19.1 (6.8)          | 99.6 (14.6)                   | 34  | 43.6 (8.2)          | 21.0 (1.6)         | 46.5 (2.9)         | 27.5 (3.6)         | 94.9 (6.5)          |
| rs4451422 FPGS    | t>g  | Wt      | 61                            | 55.8 (10.3)          | 31.6 (3.0)         | <b>52.3 (52.3)**</b> | <b>24.8 (3.8)**</b> | <b>108.7 (8.1)***</b>         | 172 | 46.5 (5.8)          | 24.3 (1.2)         | <b>53.3 (2.1)*</b> | <b>34.3 (2.6)*</b> | <b>111.8 (4.6)*</b> |
|                   |      | Het/var | 22                            | 46.0 (6.3)           | 26.9 (1.8)         | <b>37.8 (2.4)**</b>  | <b>12.2 (2.3)**</b> | <b>76.8 (4.9)***</b>          | 68  | 41.6 (3.8)          | 21.9 (0.8)         | <b>48.6 (1.4)*</b> | <b>28.3 (1.7)*</b> | <b>98.8 (3.0)*</b>  |
| rs514933 FOLR2    | t>c  | Wt      | 25                            | 41.6 (9.6)           | 26.1 (2.8)         | 41.4 (3.9)           | 16.2 (3.7)          | 83.7 (8.1)                    | 90  | 46.8 (5.1)          | 22.3 (1.0)         | 48.1 (1.8)         | 27.1 (2.2)         | 97.6 (4.1)          |
|                   |      | het     | 46                            | 53.9 (7.1)           | 29.3 (2.1)         | 40.0 (2.9)           | 13.3 (2.7)          | 82.6 (6.0)                    | 113 | 39.3 (4.6)          | 21.8 (0.9)         | 50.9 (1.6)         | 32.2 (2.0)         | 104.9 (3.7)         |
|                   |      | var     | 12                            | 39.0 (13.7)          | 26.6 (4.0)         | 47.1 (5.5)           | 21.5 (5.3)          | 95.1 (11.6)                   | 37  | 44.8 (7.8)          | 25.8 (1.6)         | 51.6 (2.8)         | 30.2 (3.4)         | 107.7 (6.3)         |
| rs5751876 ADORA2A | t>c  | Wt      | 35                            | 43.8 (8.1)           | 28.3 (2.3)         | 40.7 (3.3)           | 14.7 (3.1)          | 83.7 (6.8)                    | 77  | 38.5 (5.5)          | 22.5 (1.1)         | 49.9 (2.0)         | 30.8 (2.4)         | 103.2 (4.5)         |
|                   |      | het     | 40                            | 54.5 (7.7)           | 28.2 (2.2)         | 42.9 (3.1)           | 17.2 (2.9)          | 88.3 (6.4)                    | 115 | 46.4 (4.6)          | 22.8 (0.9)         | 49.2 (1.6)         | 28.9 (2.0)         | 101.0 (3.7)         |
|                   |      | var     | 8                             | 37.9 (16.4)          | 25.8 (4.8)         | 35.8 (6.6)           | 7.5 (6.3)           | 69.1 (13.8)                   | 48  | 42.1 (6.9)          | 22.2 (1.4)         | 51.8 (2.5)         | 31.2 (3.0)         | 105.1 (5.5)         |
| rs2032582 ABCB1   | g>t/ | gg      | 25                            | 40.8 (9.9)           | 26.1 (2.9)         | 39.7 (4.1)           | 12.5 (3.9)          | 78.3 (8.4)                    | 72  | 39.2 (5.7)          | 22.8 (1.1)         | 51.1 (2.0)         | 29.8 (2.5)         | 103.7 (4.6)         |
|                   |      | gt      | 38                            | 58.8 (7.7)           | 30.3 (2.2)         | 41.9 (3.1)           | 14.1 (3.0)          | 86.3 (6.5)                    | 112 | 42.4 (4.6)          | 21.7 (0.9)         | 48.2 (1.6)         | 30.4 (2.0)         | 100.3 (3.7)         |
|                   |      | ga      | 1                             | 24.4 (45.9)          | 16.4 (13.3)        | 33.2 (18.8)          | 9.8 (17.8)          | 59.3 (38.9)                   | 5   | 26.2 (21.1)         | 20.6 (4.2)         | 52.1 (7.5)         | 32.6 (9.4)         | 105.2 (16.9)        |
|                   |      | ta      | 4                             | 30.4 (23.5)          | 21.3 (6.8)         | 30.3 (9.6)           | 10.3 (9.1)          | 62.0 (19.9)                   | 6   | 25.6 (19.4)         | 20.7 (3.9)         | 51.5 (6.8)         | 28.3 (8.6)         | 100.5 (15.5)        |

|                   |     |         |             |                     |                     |                    |                   |                      |             |                     |             |             |                     |                     |
|-------------------|-----|---------|-------------|---------------------|---------------------|--------------------|-------------------|----------------------|-------------|---------------------|-------------|-------------|---------------------|---------------------|
|                   | aa  | 0       | n/a         | n/a                 | n/a                 | n/a                | n/a               | 44                   | 54.4 (7.3)  | 24.8 (1.5)          | 51.4 (2.6)  | 29.0 (3.3)  | 105.2 (5.9)         |                     |
|                   | tt  | 15      | 38.2 (11.8) | 26.7 (3.4)          | 44.2 (4.8)          | 22.2 (4.6)         | 93.2 (10.0)       | 1                    | 47.6 (47.5) | 36.5 (9.4)          | 93.6 (16.8) | 42.8 (21.1) | 172.9 (38.1)        |                     |
| rs1128503 ABCB1   | c>t | Wt      | 27          | 41.0 (9.6)          | 25.7 (2.8)          | 41.2 (4.5)         | 12.2 (3.7)        | 76.8 (8.1)           | 75          | 39.9 (5.6)          | 22.6 (1.1)  | 51.9 (2.0)  | 30.9 (2.5)          | 105.5 (4.5)         |
|                   |     | het     | 39          | 56.5 (7.7)          | 30.6 (2.2)          | 41.2 (4.5)         | 14.7 (3.0)        | 88.1 (6.5)           | 118         | 40.2 (4.5)          | 21.7 (0.9)  | 48.2 (1.6)  | 29.8 (2.0)          | 99.7 (3.6)          |
|                   |     | var     | 17          | 40.7 (11.1)         | 25.5 (3.2)          | 41.2 (4.5)         | 19.9 (4.3)        | 86.6 (9.4)           | 47          | 55.2 (7.0)          | 24.9 (1.4)  | 51.5 (2.5)  | 28.9 (3.1)          | 105.2 (5.6)         |
| rs1045642 ABCB1   | t>c | Wt      | 14          | <b>37.1 (12.7)*</b> | <b>20.6 (3.5)**</b> | <b>31.7 (5.1)*</b> | <b>10.3 (5.0)</b> | <b>62.6 (10.3)**</b> | 52          | 38.6 (6.8)          | 22.3 (1.4)  | 50.5 (2.4)  | 29.3 (3.0)          | 102.1 (5.4)         |
|                   |     | het     | 41          | <b>37.9 (7.3)*</b>  | <b>25.0 (2.0)**</b> | <b>38.4 (2.9)*</b> | <b>13.3 (2.9)</b> | <b>76.7 (6.0)**</b>  | 122         | 43.9 (4.5)          | 22.6 (0.9)  | 49.2 (1.6)  | 30.5 (2.0)          | 102.2 (3.6)         |
|                   |     | var     | 28          | <b>66.0 (8.5)*</b>  | <b>34.5 (2.3)**</b> | <b>48.5 (3.4)*</b> | <b>19.5 (3.3)</b> | <b>102.5 (6.9)**</b> | 66          | 44.6 (6.0)          | 22.9 (1.2)  | 50.9 (2.1)  | 29.6 (2.6)          | 103.4 (4.8)         |
| rs1801131 MTHFR   | a>c | Wt      | 44          | 45.4 (7.2)          | 26.4 (2.1)          | 38.8 (2.9)         | 15.2 (2.8)        | 80.5 (6.0)           | 111         | <b>36.1 (4.7)*</b>  | 22.1 (0.9)  | 50.9 (1.7)  | 32.3 (2.1)          | 105.3 (3.8)         |
|                   |     | het     | 29          | 54.1 (9.4)          | 29.3 (2.7)          | 44.8 (3.8)         | 15.8 (3.6)        | 90.0 (7.9)           | 107         | <b>45.5 (4.6)*</b>  | 22.4 (0.9)  | 48.6 (1.7)  | 28.4 (2.1)          | 99.5 (3.7)          |
|                   |     | var     | 10          | 47.7 (14.7)         | 32.0 (4.2)          | 44.2 (5.9)         | 13.9 (5.7)        | 90.1 (12.3)          | 22          | <b>63.5 (10.0)*</b> | 25.8 (2.0)  | 51.8 (3.6)  | 26.7 (4.5)          | 104.4 (8.1)         |
| rs1801133 MTHFR   | c>t | Wt      | 50          | 44.8 (7.1)          | 27.3 (2.0)          | 40.0 (2.9)         | 14.9 (2.8)        | 82.2 (5.9)           | 107         | 44.3 (4.8)          | 22.1 (1.0)  | 48.9 (1.7)  | 29.2 (2.1)          | 100.3 (3.8)         |
|                   |     | het     | 26          | 58.1 (9.1)          | 30.3 (2.6)          | 44.7 (3.7)         | 16.4 (3.6)        | 91.4 (7.7)           | 97          | 44.8 (4.9)          | 23.1 (1.0)  | 50.6 (1.7)  | 29.9 (2.2)          | 103.6 (3.9)         |
|                   |     | var     | 7           | 34.7 (17.4)         | 23.8 (5.0)          | 37.1 (7.0)         | 13.0 (6.8)        | 73.9 (14.6)          | 36          | 33.9 (8.0)          | 22.6 (1.6)  | 51.3 (2.9)  | 32.4 (3.5)          | 106.3 (6.4)         |
| rs717620 ABCC2    | g>a | WT      | 58          | 51.2 (6.4)          | 28.1 (1.9)          | 41.9 (2.6)         | 16.0 (2.5)        | 86.0 (5.4)           | 174         | 39.9 (3.7)          | 22.4 (0.7)  | 49.5 (1.3)  | 29.7 (1.6)          | 101.6 (3.0)         |
|                   |     | Het/Var | 25          | 41.1 (9.7)          | 27.7 (2.8)          | 39.9 (3.9)         | 13.4 (3.8)        | 81.1 (8.2)           | 65          | 52.2 (6.1)          | 23.2 (1.2)  | 50.9 (2.2)  | 30.6 (2.7)          | 104.6 (4.9)         |
| rs4148396 ABCC2   | t>c | Wt      | 29          | 54.0 (8.7)          | 29.1 (2.5)          | 41.8 (3.6)         | 15.3 (3.4)        | 86.1 (7.4)           | 104         | 44.3 (4.7)          | 22.5 (0.9)  | 48.1 (1.7)  | 27.8 (2.1)          | 98.5 (3.8)          |
|                   |     | het     | 47          | 42.0 (7.1)          | 27.2 (2.1)          | 41.2 (2.9)         | 15.8 (2.8)        | 84.1 (6.1)           | 109         | 40.8 (4.8)          | 22.7 (1.0)  | 50.2 (1.7)  | 32.2 (2.1)          | 106.9 (3.9)         |
|                   |     | var     | 7           | 70.0 (17.5)         | 29.4 (5.1)          | 40.4 (7.2)         | 10.6 (6.9)        | 80.4 (15.0)          | 27          | 46.1 (9.2)          | 22.7 (1.8)  | 49.6 (3.3)  | 30.5 (4.1)          | 102.7 (7.4)         |
| rs2231142 ABCG2   | a>c | WT/Het  | 69          | 44.0 (6.2)          | 26.8 (1.8)          | 42.5 (2.5)         | 16.8 (2.4)        | 86.1 (5.3)           | 186         | 43.3 (3.8)          | 22.3 (0.7)  | 49.7 (1.3)  | 29.9 (1.7)          | 101.9 (3.0)         |
|                   |     | var     | 14          | 65.7 (12.1)         | 32.7 (3.5)          | 36.5 (4.9)         | 9.2 (4.7)         | 78.5 (10.3)          | 54          | 42.0 (6.4)          | 23.6 (1.3)  | 50.9 (2.3)  | 30.2 (2.8)          | 104.6 (5.2)         |
| rs13120400 ABCG2  | c>t | WT/Het  | 78          | 48.5 (5.8)          | 28.0 (1.7)          | 42.1 (2.3)         | 15.9 (2.2)        | 86.1 (4.8)           | 223         | 42.7 (3.4)          | 22.4 (0.7)  | 49.8 (1.2)  | 30.0 (1.5)          | 102.2 (2.7)         |
|                   |     | var     | 5           | 46.0 (20.8)         | 28.3 (6.0)          | 27.0 (8.2)         | 3.1 (7.9)         | 58.4 (17.2)          | 17          | 48.1 (11.8)         | 25.2 (2.3)  | 52.1 (4.2)  | 30.2 (5.2)          | 107.5 (9.4)         |
| rs 3785911 ABCC3  | c>t | Wt      | 43          | 49.0 (7.4)          | 27.1 (2.1)          | 40.9 (3.0)         | 13.8 (2.9)        | 81.8 (6.2)           | 126         | 46.4 (44.4)         | 22.9 (0.9)  | 48.3 (1.6)  | <b>27.5 (1.9)**</b> | <b>98.7 (3.5)*</b>  |
|                   |     | het     | 30          | 44.7 (8.8)          | 28.0 (2.5)          | 41.8 (3.6)         | 16.8 (3.4)        | 86.5 (7.4)           | 93          | 40.5 (5.0)          | 22.4 (1.0)  | 50.6 (1.8)  | <b>30.1 (2.2)**</b> | <b>103.0 (4.0)*</b> |
|                   |     | var     | 10          | 59.4 (15.2)         | 33.6 (4.4)          | 41.8 (6.2)         | 17.4 (5.9)        | 92.8 (12.8)          | 21          | 34.6 (10.3)         | 21.9 (2.1)  | 56.8 (3.7)  | <b>43.5 (4.5)**</b> | <b>122.2 (8.2)*</b> |
| rs4793665 ABCC3   | c>t | Wt      | 22          | 32.3 (10.1)         | 23.8 (2.9)          | 41.8 (4.2)         | 18.6 (4.0)        | 84.4 (8.7)           | 79          | <b>44.2 (5.4)*</b>  | 23.4 (1.1)  | 49.3 (1.9)  | 29.1 (2.4)          | 101.8 (4.4)         |
|                   |     | het     | 41          | 58.7 (7.8)          | 28.9 (2.3)          | 40.4 (3.2)         | 14.2 (3.1)        | 83.4 (6.7)           | 119         | <b>37.1 (4.4)*</b>  | 21.8 (0.9)  | 49.3 (1.6)  | 30.0 (2.0)          | 101.1 (3.6)         |
|                   |     | var     | 20          | 46.4 (10.0)         | 30.3 (2.9)          | 42.3 (4.1)         | 14.0 (3.9)        | 86.6 (8.6)           | 42          | <b>58.6 (7.4)*</b>  | 23.2 (1.5)  | 53.5 (2.7)  | 31.6 (3.3)          | 108.2 (6.0)         |
| rs1051266 SLC19A1 | g>a | WT/Het  | 67          | 51.5 (6.1)          | 28.7 (1.8)          | 42.6 (2.4)         | 15.5 (2.4)        | 86.8 (5.1)           | 203         | 44.5 (3.5)          | 23.0 (0.7)  | 49.7 (1.3)  | 28.9 (1.6)          | 101.6 (2.8)         |
|                   |     | var     | 16          | 34.8 (11.7)         | 25.0 (3.4)          | 35.7 (4.7)         | 14.3 (4.5)        | 75.0 (9.8)           | 37          | 34.9 (7.8)          | 20.5 (1.6)  | 51.5 (2.8)  | 35.8 (3.4)          | 107.9 (6.3)         |
| rs2239907 SLC46A1 | a>g | Wt      | 26          | 46.9 (9.0)          | <b>26.9 (2.5)*</b>  | 41.4 (3.6)         | 15.9 (3.5)        | 84.2 (7.6)           | 73          | <b>37.6 (5.6)*</b>  | 23.8 (1.1)  | 51.2 (2.0)  | 30.7 (2.5)          | 105.7 (4.6)         |
|                   |     | het     | 4           | 46.4 (7.7)          | <b>26.1 (2.1)*</b>  | 39.7 (3.1)         | 15.7 (3.0)        | 81.6 (6.5)           | 119         | <b>39.0 (4.4)*</b>  | 21.2 (0.9)  | 48.9 (1.6)  | 30.5 (2.0)          | 100.6 (3.6)         |
|                   |     | var     | 10          | 59.7 (14.6)         | <b>38.0 (4.0)*</b>  | 47.1 (5.9)         | 11.8 (5.6)        | 96.9 (12.2)          | 48          | <b>60.9 (6.8)*</b>  | 24.2 (1.4)  | 50.7 (2.5)  | 27.6 (3.0)          | 102.5 (5.5)         |

\* p < 0.05. \*\*p < 0.01. \*\*\*p < 0.001. WT: wild type; Het = heterozygous; Var: homozygous variant. ABCB1/ABCC1/ABCC2/ABCC3/ABCC4/ABCC5/ABCG2: adenosine triphosphate-binding cassette transporter subfamily B/C/G member 1/2/3/4/; FPGS: folylpolyglutamate synthetase; FOLR1/FOLR2: folate receptor 1/2; GGH: gamma glutamyl hydrolase; SLC 46A1/SLC19A:solute carrier 46A1/19A1; SNP: single-nucleotide polymorphism.
